# Supplementary material for: An electrochemical sensor for paracetamol based on an electropolymerized molecularly imprinted o-phenylenediamine film on a multi-walled carbon nanotube modified glassy carbon electrode
Source: Royal Society of Chemistry journal article supplement (doi:10.1039/c4ay00753k), 2014-01-01
Supplement: c4ay00753k1.pdf [file c4ay00753k1.pdf]

**An Electrochemical sensor for paracetamol based on an electropolymerized  
molecularly imprinted *o*-phenylenediamine film on a multi-walled carbon  
nanotube modified glassy carbon electrode**

Youyuan Peng, Zhibo Wu, Zhigang Liu

Department of Chemistry, Quanzhou Normal University, Quanzhou 362000, China

Corresponding author. Youyuan Peng

E-mail: youyuanpeng@hotmail.com. Fax: 86-595-2291 9563. Tel: 86-595-2291 9563.

Supporting information

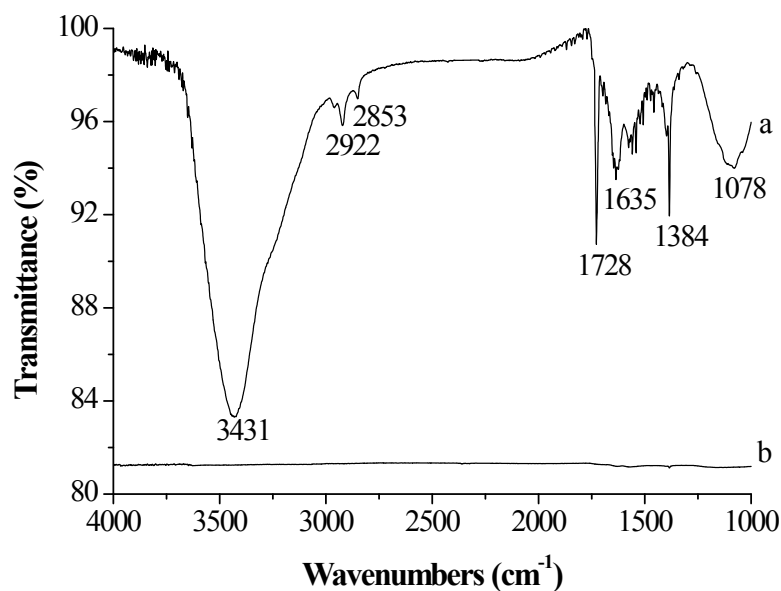

**Fig.S1** FT-IR spectra of MWCNTs (a. acid processed MWCNTs; b. received-MWCNTs).

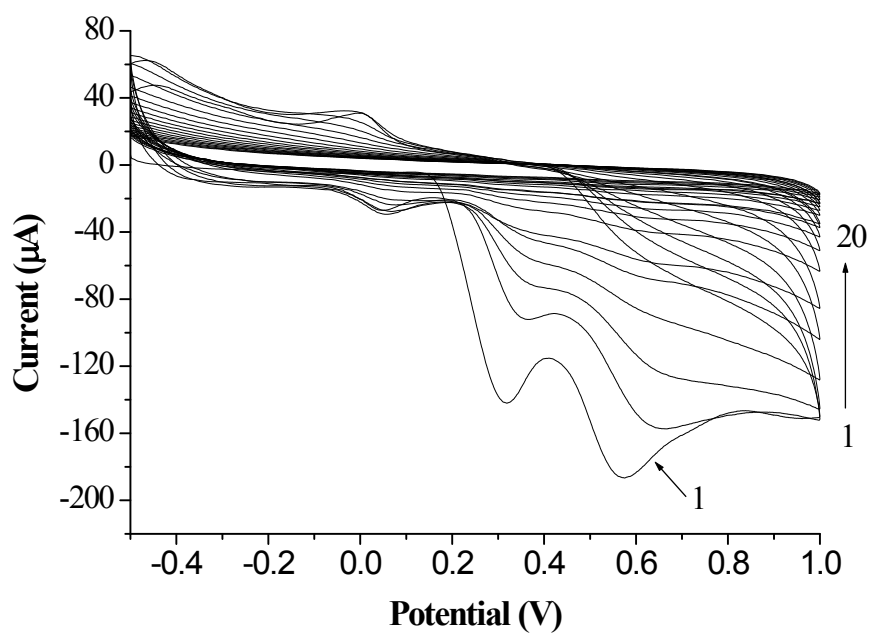

**Fig. S2** Repetitive cyclic voltammograms during the electrocopolymerization of *o*PD (5.0 mmol L<sup>-1</sup>) and PT (5.0 mmol L<sup>-1</sup>) onto MGCE. Scan rate: 50 mV s<sup>-1</sup>. Supporting electrolyte: N<sub>2</sub>-saturated PBS (0.05 mol L<sup>-1</sup>, pH: 7.0) containing 0.1 mol L<sup>-1</sup> KCl. Scan circles: 20.

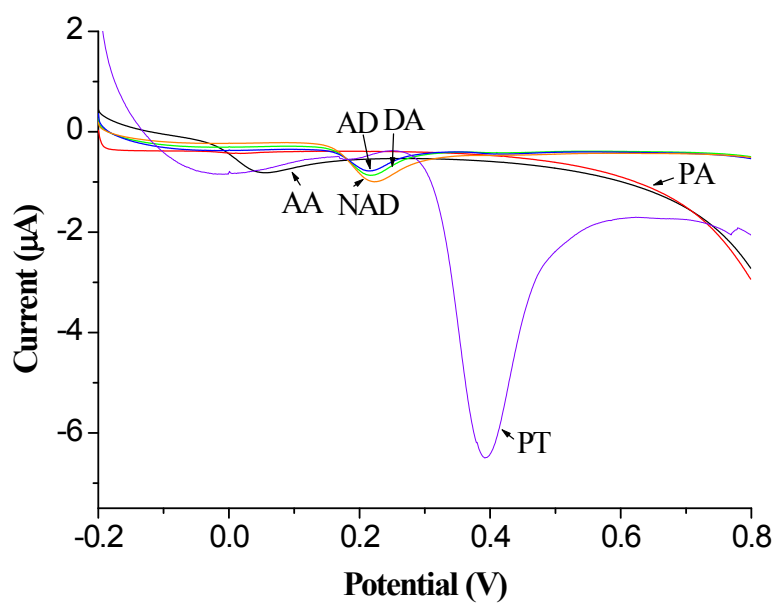

**Fig. S3** LSVs of MIP-MGCE to  $10 \mu\text{mol L}^{-1}$  PT,  $10 \mu\text{mol L}^{-1}$  DA,  $10 \mu\text{mol L}^{-1}$  PA,  $10 \mu\text{mol L}^{-1}$  AA,  $10 \mu\text{mol L}^{-1}$ AD and  $10 \mu\text{mol L}^{-1}$  NAD, respectively.

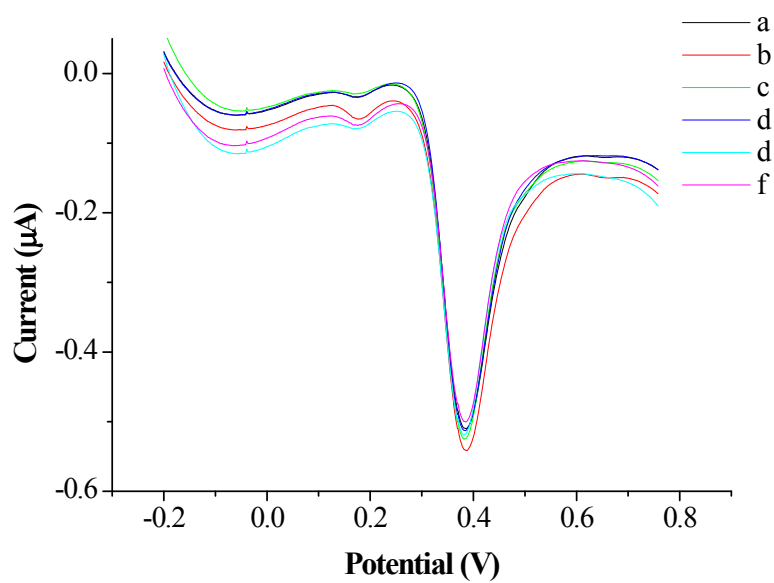

**Fig. S4** LSVs of MIP-MGCE to 1  $\mu\text{mol L}^{-1}$  PT in the presence of 10  $\mu\text{M}$  DA, PA, AA, AD and NAD, respectively. (a) 1  $\mu\text{mol L}^{-1}$  PT; (b) 1  $\mu\text{mol L}^{-1}$  PT and 10  $\mu\text{mol L}^{-1}$  DA; (c) 1  $\mu\text{mol L}^{-1}$  PT and 10  $\mu\text{mol L}^{-1}$  PA; (d) 1  $\mu\text{mol L}^{-1}$  PT and 10  $\mu\text{mol L}^{-1}$  AA; (e) 1  $\mu\text{mol L}^{-1}$  PT and 10  $\mu\text{mol L}^{-1}$  AD; (f) 1  $\mu\text{mol L}^{-1}$  PT and 10  $\mu\text{mol L}^{-1}$  NAD.
